# Supplementary material for: Sustainable chemo-enzymatic NADP(H) synthesis from biomass-derived xylose, polyphosphate, and nicotinamide
Source: Royal Society of Chemistry journal article supplement (doi:10.1039/d5gc00983a), 2025-01-01
Supplement: d5gc00983a1.pdf [file d5gc00983a1.pdf]

## Supplementary Information

The supplementary information contains:

### Supplementary Materials and Methods

#### Supplementary Figures

**Figure S1.** Sugarcane bagasse-derived crude xylose production *via* thermal acidic hydrolysis.

**Figure S2.** Enzymatic synthesis of reduced nicotinamide adenine dinucleotide (NADH) from nicotinamide mononucleotide (NMN).

**Figure S3.** One-pot enzymatic synthesis of reduced nicotinamide adenine dinucleotide (NADH) from ribose-5-phosphate (R5P).

**Figure S4.** Time-dependent analysis of polyphosphate (polyP) consumption and nicotinamide adenine dinucleotide (NADH) synthesis in the one-pot, one-step enzymatic synthesis of NADH from commercial xylose with varying concentrations of xylose, ATP, or nicotinamide (NAM).

**Figure S5.** Optimization of one-pot, one-step enzymatic synthesis of nicotinamide adenine dinucleotide (NADH) from commercial xylose.

**Figure S6.** Sodium dodecyl sulfate-polyacrylamide gel electrophoresis (SDS-PAGE) gel images of purified recombinant proteins.

**Figure S7.** Standard curves of polyphosphate (polyP), xylose, and reduced nicotinamide adenine dinucleotide phosphate (NADH) determined by UV-Vis analysis.

**Figure S8.** High-performance liquid chromatography (HPLC) chromatograms of dihydrofolate (DHF), folic acid (FA), nicotinamide adenine dinucleotide (NAD(H)), nicotinamide adenine dinucleotide phosphate (NADP(H)), tetrahydrofolate (THF), xylose, and D-xylulose-5-phosphate (Xu5P).

**Figure S9.** Standard curves of D-xylulose-5-phosphate (Xu5P; 13.5 min), nicotinamide adenine dinucleotide (NAD<sup>+</sup>; 36.8 min), nicotinamide adenine dinucleotide phosphate (NADP<sup>+</sup>; 30.8 min), reduced NAD<sup>+</sup> (NADH; 42 min), and reduced NADP<sup>+</sup> (NADPH; 35.8 min) determined by high-performance liquid chromatography (HPLC) analysis.

**Figure S10.** Standard curves of tetrahydrofolate (THF; 10.0 min) and folic acid (FA; 12.2 min) determined by high-performance liquid chromatography (HPLC) analysis.

**Figure S11.** Synthesis tree of E-factor analysis for NADH synthesis.

**Figure S12.** Synthesis tree of E-factor analysis for NADH synthesis.

#### Supplementary Tables

**Table S1.** The list of recombinant proteins and commercial enzymes used in this work.

**Table S2.** Comparison of the NMN/NAD(P)H synthesis strategies.

**Table S3.** Materials prices.

### **Supplementary Data**

**Data S1.** Thermodynamic calculation of the *in vitro* one-pot enzymatic NAD(P)H synthesis process.

**Data S2.** E-factor calculation of the *in vitro* one-pot enzymatic NAD(P)H synthesis process.

**Data S3.** Cost calculation for chemo-enzymatic NADPH synthesis

### **Supplementary References**
